# Supplementary material for: The combination of immune checkpoint inhibitors and antibody-drug conjugates in the treatment of urogenital tumors: a review insights from phase 2 and 3 studies
Source: Springer Nature journal article supplement (doi:10.1038/s41419-024-06837-w), 2024-06-19
Supplement: MOESM1 [file 41419_2024_6837_MOESM1_ESM.pdf]

## **Supplementary Table legends**

**Supplementary Table S1. Ongoing clinical trials in UC.**

**Supplementary Table S2. Ongoing clinical trials in PCa.**

**Supplementary Table S3. Ongoing clinical trials in TGCT.**

**Supplementary Table S4. Ongoing clinical trials in PeCa.**

**Supplementary Table S1. Ongoing clinical trials in UC.**

| Categories | Clinical trials | Phases | Patients   | Drugs         | Targets             | Clinical outcomes   | References                                                                  |
|------------|-----------------|--------|------------|---------------|---------------------|---------------------|-----------------------------------------------------------------------------|
| ICIs       | MK-3475-992     | 3      | 636 MIBC   | Pemb          | PD-1                | Not published yet.  | From: <a href="https://clinicaltrials.gov/">https://clinicaltrials.gov/</a> |
|            | RC48-C009       | 2      | 60 Ia/mUC  | RC48-ADC      | HER-2               | Not published yet.  | From: <a href="https://clinicaltrials.gov/">https://clinicaltrials.gov/</a> |
|            | RC48-C014       | 2      | 36 UC      | RC48-ADC      | HER-2               | Not published yet.  | From: <a href="https://clinicaltrials.gov/">https://clinicaltrials.gov/</a> |
|            | NCT04073602     | 2      | 19 Ia/mUC  | RC48-ADC      | HER-2               | Not published yet.  | From: <a href="https://clinicaltrials.gov/">https://clinicaltrials.gov/</a> |
| ADCs       | NCT05016973     | 2      | 25 MIBC    | RC48-ADC+Trip | HER-2+CD3           | Not published yet.  | From: <a href="https://clinicaltrials.gov/">https://clinicaltrials.gov/</a> |
|            | IMMU-132-13     | 3      | 696 aUC    | SG            | TROP-2              | Not published yet.  | From: <a href="https://clinicaltrials.gov/">https://clinicaltrials.gov/</a> |
|            | SURE-01         | 2      | 56 MIBC    | SG            | TROP-2              | Not published yet.  | From: <a href="https://clinicaltrials.gov/">https://clinicaltrials.gov/</a> |
|            | NCT02449239     | 3      | 133 nmBC   | OM            | EpCAM               | Not published yet.  | From: <a href="https://clinicaltrials.gov/">https://clinicaltrials.gov/</a> |
|            | NCT04859751     | 3      | 53 NMBC    | VB4-845       | EpCAM               | Not published yet.  | From: <a href="https://clinicaltrials.gov/">https://clinicaltrials.gov/</a> |
|            | NCT05239624     | 2      | 23 BC      | Pemb+EV       | PD-1+ Nectin-4      | Not published yet.  | From: <a href="https://clinicaltrials.gov/">https://clinicaltrials.gov/</a> |
|            | NCT03924895     | 3      | 857 MIBC   | Pemb+EV       | PD-1+ Nectin-4      | Not published yet.  | From: <a href="https://clinicaltrials.gov/">https://clinicaltrials.gov/</a> |
|            | NCT04700124     | 3      | 784 MIBC   | Pemb+EV       | PD-1+ Nectin-4      | Not published yet.  | From: <a href="https://clinicaltrials.gov/">https://clinicaltrials.gov/</a> |
|            | NCT03606174     | 2      | 260 Ia/mUC | Pemb+EV       | PD-1+ Nectin-4      | Not published yet.  | From: <a href="https://clinicaltrials.gov/">https://clinicaltrials.gov/</a> |
|            | NCT04960709     | 3      | 830 MIBC   | Durv/Trem+EV  | PD-L1+ Nectin-4     | Not published yet.  | From: <a href="https://clinicaltrials.gov/">https://clinicaltrials.gov/</a> |
| ICIs+ADCs  | NCT03869190     | 2      | 645 mUC    | Atez+EV       | PD-L1+ Nectin-4     | Not published yet.  | From: <a href="https://clinicaltrials.gov/">https://clinicaltrials.gov/</a> |
|            | NCT04863885     | 2      | 46 mBC     | Nivo+Ipil+ SG | PD-1+ CTLA-4+TROP-2 | Not yet recruiting. | From: <a href="https://clinicaltrials.gov/">https://clinicaltrials.gov/</a> |

**Supplementary Table S2. Ongoing clinical trials in PCa.**

| Categories | Clinical trials | Phases | Patients                            | Drugs  | Targets | Clinical outcomes  | References                                                                  |
|------------|-----------------|--------|-------------------------------------|--------|---------|--------------------|-----------------------------------------------------------------------------|
| ADCs       | NCT04145622     | 2      | 195 cancers<br>(including PCa)      | I-DXd  | B7-H3   | Not published yet. | From: <a href="https://clinicaltrials.gov/">https://clinicaltrials.gov/</a> |
|            | NCT03729596     | 2      | 143 cancers<br>(including<br>mCRPC) | MGC018 | B7-H3   | Not published yet. | From: <a href="https://clinicaltrials.gov/">https://clinicaltrials.gov/</a> |
|            | NCT05551117     | 2      | 100 mCRPC                           | MGC018 | B7-H3   | Not published yet. | From: <a href="https://clinicaltrials.gov/">https://clinicaltrials.gov/</a> |

Supplementary Table S3. Ongoing clinical trials in TGCT.

| Categories | Clinical trials | Phases | Patients | Drugs   | Targets   | Clinical outcomes   | References                                                                  |
|------------|-----------------|--------|----------|---------|-----------|---------------------|-----------------------------------------------------------------------------|
| ICIs+ADCs  | NCT06041503     | 2      | 68 TGCT  | Pemb+BV | PD-1+CD30 | Not yet recruiting. | From: <a href="https://clinicaltrials.gov/">https://clinicaltrials.gov/</a> |

**Supplementary Table S4. Ongoing clinical trials in PeCa.**

| Categories | Clinical trials | Phases | Patients | Drugs | Targets | Clinical outcome        | Reference                                                                   |
|------------|-----------------|--------|----------|-------|---------|-------------------------|-----------------------------------------------------------------------------|
| ICIs       | NCT04224740     | 2      | 37 PeCa  | Pemb  | PD-1    | Active, not recruiting. | From: <a href="https://clinicaltrials.gov/">https://clinicaltrials.gov/</a> |
|            | NCT02721732     | 2      | 202 PeCa | Pemb  | PD-1    | Active, not recruiting. | From: <a href="https://clinicaltrials.gov/">https://clinicaltrials.gov/</a> |
|            | NCT03391479     | 2      | 24 PeCa  | Avel  | PD-L1   | Active, not recruiting. | From: <a href="https://clinicaltrials.gov/">https://clinicaltrials.gov/</a> |
|            | NCT03686332     | 2      | 32 PeCa  | Atez  | PD-L1   | Active, not recruiting. | From: <a href="https://clinicaltrials.gov/">https://clinicaltrials.gov/</a> |

## Language Certificate

Dear Sir or Madam:

This document certifies that the manuscript **MJD2405054**:

**The combination of immune checkpoint inhibitors and antibody-drug conjugates in the treatment of urogenital tumors: A review of phase 2 and 3 studies**

was edited for proper English language, grammar, punctuation, spelling, and overall style by a highly qualified, native English-speaking professional scientific editor at Medjaden Inc. on 15<sup>th</sup> May., 2024, Neither the research content nor the authors' intentions were altered in any way during the editing process. The final revised version can be found at

<http://pan.medjaden.com:2000/index.php?mod=shares&sid=ZWfREvQYIZ2YXhxREtxQnd5d2h6Y1ZoNUh2VXg1X0VUT3R5aEcyNw>(verification code: **2405054**)

Yours sincerely,

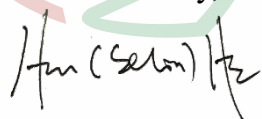

(Ms.) Hua (Selin) He for Medjaden Inc.

### Information about Medjaden Inc.

Medjaden Inc. is an emerging editing company that provides professional services for laboratory researchers, postgraduates, and clinical doctors. Our mission is to help our clients initiate, maximize and accelerate the production of articles from their research work. The company employs experienced medical statisticians and editors drawn from English backgrounds worldwide, who strive to ensure that every edited article is published in an English journal, preferably one that is included in the Web of Science (WOS), the Science Citation Index (SCI) Expanded, Medline, PubMed, EMBASE, and other scientific resources.

Email: [medjaden@gmail.com](mailto:medjaden@gmail.com); Website: [www.medjaden.com](http://www.medjaden.com)
